# Supplementary material for: Optimal symptom combinations to aid COVID-19 case identification: analysis from a community-based, prospective, observational cohort
Source: PubMed Central journal article supplement (PMC7709185; doi:10.1101/2020.11.23.20237313), 2021-02-08

## Supplementary tables and figures

**Supplementary Table e1 – List of self-reported symptoms and corresponding question used in the reporting app**

| Symptoms        | Question                                                                            |
|-----------------|-------------------------------------------------------------------------------------|
| Fatigue         | Are you experiencing unusual fatigue?                                               |
| Anosmia/ageusia | Do you have a loss of smell/taste?                                                  |
| Cough           | Do you have a persistent cough                                                      |
| Dyspnoea        | Are you experiencing unusual shortness of breath?                                   |
| Diarrhoea       | Are you experiencing diarrhoea?                                                     |
| Delirium        | Do you have any of the following symptoms: confusion, disorientation or drowsiness? |
| Skipped meals   | Have you been skipping meals?                                                       |
| Abdominal pain  | Do you have an unusual abdominal pain?                                              |
| Chest pain      | Are you feeling an unusual chest pain or tightness in your chest?                   |
| Hoarse voice    | Do you have an unusually hoarse voice?                                              |
| Headache        | Do you have a headache?                                                             |
| Sore throat     | Do you have a sore throat?                                                          |
| Myalgia         | Do you have unusual strong muscle pains?                                            |

**Supplementary Table e2 – NSGAI parameters**

| Parameter                   | Value                |
|-----------------------------|----------------------|
| Population size             | 80                   |
| Number of offspring         | 40                   |
| Total number of generations | 500                  |
| Parent selection            | Tournament Selection |
| Crossover                   | Two-point crossover  |
| Crossover probability       | 0.9                  |
| Mutation                    | Random flip          |
| Mutation probability        | 0.1                  |

**Supplementary Table e3 - Sensitivity, specificity, and Tests Per Case (TPC) for the four clinically-inferred subsets of symptoms computed on the discovery data (UK) cohort**

| Symptom                                 | Age group | 3-day analysis  |      |                 |      |     |    | 7-day analysis  |       |                 |      |     |    |
|-----------------------------------------|-----------|-----------------|------|-----------------|------|-----|----|-----------------|-------|-----------------|------|-----|----|
|                                         |           | Sensitivity (%) |      | Specificity (%) |      | TPC |    | Sensitivity (%) |       | Specificity (%) |      | TPC |    |
|                                         |           | UK              | US   | UK              | US   | UK  | US | UK              | US    | UK              | US   | UK  | US |
| Respiratory symptoms <sup>1</sup>       | All       | 44.7            | 48.1 | 81.9            | 76.6 | 43  | 21 | 57.7            | 64.6  | 79.1            | 72.3 | 38  | 19 |
|                                         | [18-54]   | 45.2            | 45.2 | 81.6            | 76.8 | 38  | 20 | 58.2            | 64.3  | 78.4            | 71.6 | 33  | 18 |
|                                         | [55+]     | 42.9            | 51.4 | 82.7            | 76.5 | 64  | 22 | 55.8            | 64.9  | 80.5            | 73.0 | 54  | 20 |
| WHO-defined pneumonia <sup>2</sup>      | All       | 58.8            | 74.7 | 71.9            | 59.5 | 51  | 23 | 70.3            | 84.8  | 68.5            | 54.5 | 46  | 23 |
|                                         | [18-54]   | 59.2            | 69.0 | 71.1            | 61.3 | 45  | 22 | 70.5            | 83.3  | 67.5            | 55.5 | 41  | 21 |
|                                         | [55+]     | 57.5            | 81.1 | 73.3            | 57.8 | 73  | 24 | 69.6            | 86.5  | 70.7            | 53.6 | 65  | 25 |
| COVID-19-specific symptoms <sup>3</sup> | All       | 67.4            | 79.7 | 69.8            | 57.6 | 48  | 23 | 81.0            | 92.4  | 66.4            | 52.6 | 43  | 22 |
|                                         | [18-54]   | 68.1            | 73.8 | 69.0            | 59.5 | 42  | 22 | 82.0            | 92.9  | 65.3            | 53.8 | 38  | 20 |
|                                         | [55+]     | 65.1            | 86.5 | 71.5            | 55.7 | 69  | 24 | 77.7            | 91.9  | 68.8            | 51.4 | 62  | 25 |
| Extended Symptoms <sup>4</sup>          | All       | 90.7            | 96.2 | 26.0            | 21.1 | 86  | 35 | 95.5            | 98.7  | 23.0            | 17.9 | 82  | 35 |
|                                         | [18-54]   | 91.2            | 95.2 | 25.0            | 22.2 | 75  | 32 | 95.5            | 100.0 | 21.7            | 18.6 | 72  | 32 |
|                                         | [55+]     | 88.9            | 97.3 | 28.1            | 20.1 | 128 | 38 | 95.4            | 97.3  | 25.7            | 17.3 | 119 | 39 |

<sup>1</sup>Cough, dyspnoea; <sup>2</sup>Cough, dyspnoea, fever; <sup>3</sup>Fever, cough, dyspnoea, and anosmia/ageusia; <sup>4</sup>Fever, cough, dyspnoea, anosmia/ageusia, fatigue, and headache

**Supplementary Table e4 – Pareto of optimal combination of symptoms for three-day analysis computed on the on the discovery (UK) training data, ordered by decreasing sensitivity (TPC: Tests per Case)**

| Combination of symptoms                                                        | sensitivity | specificity | TPC |
|--------------------------------------------------------------------------------|-------------|-------------|-----|
| fatigue, anosmia/ageusia, cough, diarrhoea, headache, sore throat              | 93.8        | 11.8        | 88  |
| fatigue, fever, anosmia/ageusia, cough, headache, sore throat                  | 92.5        | 14.9        | 85  |
| fatigue, anosmia/ageusia, cough, dyspnoea, headache, sore throat               | 92.2        | 15.3        | 85  |
| fatigue, anosmia/ageusia, cough, hoarse voice, headache, sore throat           | 92.0        | 15.5        | 85  |
| fever, anosmia/ageusia, cough, diarrhoea, headache, sore throat                | 91.7        | 17.8        | 82  |
| anosmia/ageusia, cough, diarrhoea, hoarse voice, headache, sore throat         | 91.2        | 18.9        | 81  |
| fatigue, fever, anosmia/ageusia, cough, diarrhoea, headache                    | 90.6        | 22.4        | 78  |
| fatigue, anosmia/ageusia, cough, dyspnoea, diarrhoea, headache                 | 90.5        | 22.7        | 77  |
| fatigue, anosmia/ageusia, cough, chest pain, sore throat, unusual muscle pains | 89.9        | 24.0        | 76  |
| fatigue, anosmia/ageusia, cough, dyspnoea, sore throat, unusual muscle pains   | 89.8        | 24.7        | 75  |
| fatigue, fever, anosmia/ageusia, cough, dyspnoea, headache                     | 89.4        | 26.1        | 74  |
| fatigue, fever, anosmia/ageusia, cough, delirium, headache                     | 88.6        | 26.9        | 73  |
| fatigue, fever, anosmia/ageusia, cough, headache                               | 88.4        | 27.3        | 73  |
| fatigue, anosmia/ageusia, cough, dyspnoea, headache                            | 87.7        | 27.7        | 72  |
| fever, anosmia/ageusia, cough, dyspnoea, diarrhoea, headache                   | 87.3        | 31.3        | 69  |
| anosmia/ageusia, cough, dyspnoea, diarrhoea, hoarse voice, headache            | 87.0        | 31.7        | 68  |
| fever, anosmia/ageusia, cough, diarrhoea, delirium, headache                   | 86.7        | 31.9        | 68  |
| anosmia/ageusia, cough, diarrhoea, delirium, hoarse voice, headache            | 86.1        | 32.2        | 68  |
| anosmia/ageusia, cough, dyspnoea, hoarse voice, headache, unusual muscle pains | 86.0        | 35.2        | 65  |
| fever, anosmia/ageusia, cough, dyspnoea, hoarse voice, headache                | 85.8        | 35.8        | 64  |
| fever, anosmia/ageusia, cough, delirium, hoarse voice, headache                | 85.1        | 36.1        | 64  |
| fever, anosmia/ageusia, cough, dyspnoea, delirium, headache                    | 84.9        | 36.4        | 64  |
| anosmia/ageusia, cough, dyspnoea, delirium, hoarse voice, headache             | 84.6        | 37.2        | 63  |
| anosmia/ageusia, cough, hoarse voice, headache, unusual muscle pains           | 84.2        | 37.4        | 63  |
| fever, anosmia/ageusia, cough, dyspnoea, headache                              | 84.1        | 38.3        | 62  |
| anosmia/ageusia, cough, dyspnoea, hoarse voice, headache                       | 83.7        | 39.2        | 61  |
| fatigue, fever, anosmia/ageusia, cough, dyspnoea, unusual muscle pains         | 83.5        | 40.0        | 60  |
| fatigue, anosmia/ageusia, cough, dyspnoea, hoarse voice, unusual muscle pains  | 83.2        | 40.3        | 60  |
| fatigue, anosmia/ageusia, cough, dyspnoea, chest pain, unusual muscle pains    | 82.5        | 40.7        | 59  |
| fatigue, fever, anosmia/ageusia, cough, dyspnoea, delirium                     | 82.1        | 41.6        | 58  |
| fatigue, fever, anosmia/ageusia, cough, dyspnoea                               | 82.0        | 42.3        | 58  |
| fatigue, anosmia/ageusia, cough, dyspnoea, unusual muscle pains                | 81.5        | 42.8        | 57  |
| fatigue, fever, anosmia/ageusia, cough, delirium                               | 80.6        | 43.4        | 57  |
| fatigue, fever, anosmia/ageusia, cough                                         | 80.2        | 44.1        | 56  |
| fatigue, anosmia/ageusia, cough, unusual muscle pains                          | 79.4        | 44.7        | 55  |
| fatigue, fever, anosmia/ageusia, delirium, unusual muscle pains                | 78.5        | 45.2        | 55  |
| fatigue, fever, anosmia/ageusia, unusual muscle pains                          | 78.2        | 45.9        | 54  |

|                                                                                  |      |      |    |
|----------------------------------------------------------------------------------|------|------|----|
| fatigue, fever, anosmia/ageusia, dyspnoea                                        | 77·6 | 46·0 | 54 |
| fatigue, anosmia/ageusia, dyspnoea, unusual muscle pains                         | 76·9 | 46·7 | 53 |
| fatigue, fever, anosmia/ageusia, delirium                                        | 76·1 | 47·7 | 52 |
| fatigue, fever, anosmia/ageusia                                                  | 75·6 | 48·5 | 52 |
| fever, anosmia/ageusia, cough, diarrhoea, chest pain, unusual muscle pains       | 75·4 | 51·4 | 49 |
| fever, anosmia/ageusia, cough, dyspnoea, diarrhoea, unusual muscle pains         | 75·0 | 52·4 | 48 |
| fever, anosmia/ageusia, cough, diarrhoea, delirium, unusual muscle pains         | 74·2 | 53·1 | 47 |
| anosmia/ageusia, cough, dyspnoea, diarrhoea, hoarse voice, unusual muscle pains  | 74·0 | 53·7 | 46 |
| fever, anosmia/ageusia, cough, dyspnoea, abdominal pain, unusual muscle pains    | 73·8 | 53·8 | 46 |
| fever, anosmia/ageusia, cough, dyspnoea, diarrhoea, hoarse voice                 | 73·7 | 54·2 | 46 |
| fever, anosmia/ageusia, cough, dyspnoea, hoarse voice, unusual muscle pains      | 73·5 | 58·5 | 42 |
| fever, anosmia/ageusia, cough, dyspnoea, chest pain, unusual muscle pains        | 72·8 | 59·1 | 41 |
| fever, anosmia/ageusia, cough, dyspnoea, skipped meals, hoarse voice             | 72·6 | 60·1 | 40 |
| anosmia/ageusia, cough, dyspnoea, chest pain, hoarse voice, unusual muscle pains | 72·1 | 61·3 | 39 |
| fever, anosmia/ageusia, cough, dyspnoea, unusual muscle pains                    | 71·1 | 62·6 | 37 |
| anosmia/ageusia, cough, dyspnoea, hoarse voice, unusual muscle pains             | 70·2 | 64·8 | 35 |
| fever, anosmia/ageusia, cough, dyspnoea, hoarse voice                            | 69·2 | 65·4 | 35 |
| anosmia/ageusia, cough, dyspnoea, chest pain, unusual muscle pains               | 68·1 | 65·6 | 34 |
| fever, anosmia/ageusia, cough, dyspnoea, chest pain                              | 67·9 | 65·9 | 34 |
| fever, anosmia/ageusia, cough, dyspnoea, delirium                                | 67·8 | 65·9 | 34 |
| fever, anosmia/ageusia, cough, unusual muscle pains                              | 67·6 | 66·9 | 33 |
| fever, anosmia/ageusia, cough, skipped meals                                     | 66·4 | 69·0 | 31 |
| fever, anosmia/ageusia, cough, dyspnoea                                          | 65·9 | 70·1 | 30 |
| fever, anosmia/ageusia, cough, delirium                                          | 64·3 | 70·5 | 30 |
| fever, anosmia/ageusia, cough                                                    | 61·5 | 75·3 | 25 |
| fever, anosmia/ageusia, dyspnoea                                                 | 55·8 | 76·4 | 24 |
| fever, anosmia/ageusia, skipped meals                                            | 55·3 | 76·6 | 23 |
| anosmia/ageusia, cough, hoarse voice                                             | 53·9 | 79·3 | 21 |
| anosmia/ageusia, cough, dyspnoea                                                 | 53·2 | 79·5 | 21 |
| anosmia/ageusia, cough, delirium                                                 | 49·0 | 79·7 | 20 |
| fever, anosmia/ageusia                                                           | 47·5 | 83·7 | 16 |
| anosmia/ageusia, cough                                                           | 45·6 | 85·9 | 14 |
| anosmia/ageusia, hoarse voice                                                    | 35·5 | 87·1 | 13 |
| anosmia/ageusia, delirium                                                        | 24·6 | 89·2 | 11 |

**Supplementary Table e5 – Pareto of optimal combination of symptoms for seven-day analysis computed on the discovery (UK) training data, ordered by decreasing sensitivity (TPC: Tests per Case)**

| Combination of symptoms                                                              | sensitivity | specificity | TPC |
|--------------------------------------------------------------------------------------|-------------|-------------|-----|
| fatigue, anosmia/ageusia, cough, diarrhoea, headache, sore throat                    | 97.5        | 93.8        | 90  |
| fatigue, fever, anosmia/ageusia, cough, headache, sore throat,                       | 96.7        | 91.6        | 87  |
| fatigue, fever, anosmia/ageusia, cough, diarrhoea, sore throat,                      | 96.0        | 87.3        | 82  |
| fatigue, fever, anosmia/ageusia, cough, sore throat, unusual muscle pains            | 95.5        | 84.0        | 79  |
| fatigue, anosmia/ageusia, cough, dyspnoea, sore throat, unusual muscle pains         | 95.0        | 83.7        | 78  |
| fatigue, anosmia/ageusia, cough, hoarse voice, sore throat, unusual muscle pains     | 94.8        | 83.5        | 78  |
| fatigue, anosmia/ageusia, cough, delirium, sore throat, unusual muscle pains         | 94.7        | 83.4        | 77  |
| fatigue, anosmia/ageusia, cough, sore throat, unusual muscle pains                   | 94.5        | 83.0        | 77  |
| fatigue, fever, anosmia/ageusia, cough, headache                                     | 93.8        | 82.5        | 76  |
| anosmia/ageusia, cough, dyspnoea, diarrhoea, sore throat, unusual muscle pains       | 92.8        | 77.8        | 71  |
| fatigue, fever, anosmia/ageusia, cough, dyspnoea, diarrhoea                          | 92.3        | 75.3        | 68  |
| fatigue, fever, anosmia/ageusia, cough, abdominal pain, unusual muscle pains         | 92.2        | 74.3        | 67  |
| fatigue, fever, anosmia/ageusia, cough, dyspnoea, unusual muscle pains               | 91.7        | 71.1        | 64  |
| fatigue, fever, anosmia/ageusia, cough, unusual muscle pains                         | 91.0        | 69.8        | 62  |
| fatigue, fever, anosmia/ageusia, cough, dyspnoea                                     | 90.5        | 69.5        | 62  |
| fatigue, anosmia/ageusia, cough, dyspnoea, unusual muscle pains                      | 90.2        | 69.3        | 61  |
| fatigue, fever, anosmia/ageusia, persistent cough                                    | 89.7        | 68.2        | 60  |
| fatigue, anosmia/ageusia, cough, unusual muscle pains                                | 89.2        | 68.1        | 59  |
| fatigue, fever, anosmia/ageusia, unusual muscle pains                                | 88.4        | 67.2        | 58  |
| fatigue, fever, anosmia/ageusia, skipped meals                                       | 88.2        | 67.1        | 58  |
| fatigue, anosmia/ageusia, persistent cough                                           | 87.0        | 66.5        | 57  |
| fatigue, fever, anosmia/ageusia                                                      | 86.9        | 65.4        | 55  |
| fever, anosmia/ageusia, cough, dyspnoea, diarrhoea, unusual muscle pains             | 86.0        | 61.5        | 52  |
| anosmia/ageusia, cough, dyspnoea, diarrhoea, hoarse voice, unusual muscle pains      | 85.9        | 60.1        | 50  |
| anosmia/ageusia, cough, dyspnoea, diarrhoea, skipped meals, unusual muscle pains     | 85.4        | 59.8        | 50  |
| anosmia/ageusia, cough, dyspnoea, abdominal pain, hoarse voice, unusual muscle pains | 85.2        | 59.0        | 49  |
| fever, anosmia/ageusia, cough, dyspnoea, hoarse voice, unusual muscle pains          | 85.0        | 54.8        | 45  |
| anosmia/ageusia, cough, dyspnoea, skipped meals, hoarse voice, unusual muscle pains  | 84.5        | 54.1        | 45  |
| anosmia/ageusia, cough, dyspnoea, chest pain, hoarse voice, unusual muscle pains     | 84.4        | 51.8        | 43  |
| anosmia/ageusia, cough, dyspnoea, hoarse voice, unusual muscle pains                 | 82.7        | 48.6        | 39  |
| anosmia/ageusia, cough, dyspnoea, chest pain, unusual muscle pains                   | 81.2        | 48.3        | 38  |
| fever, anosmia/ageusia, cough, unusual muscle pains                                  | 79.7        | 47.5        | 37  |
| anosmia/ageusia, cough, dyspnoea, chest pain, hoarse voice                           | 79.5        | 44.1        | 34  |
| fever, anosmia/ageusia, cough, dyspnoea                                              | 78.4        | 44.0        | 33  |
| anosmia/ageusia, cough, dyspnoea, hoarse voice                                       | 76.5        | 40.0        | 30  |
| anosmia/ageusia, cough, unusual muscle pains                                         | 75.4        | 39.4        | 29  |
| anosmia/ageusia, cough, dyspnoea, chest pain                                         | 75.2        | 39.4        | 29  |

|                                                 |      |      |    |
|-------------------------------------------------|------|------|----|
| fever, anosmia/ageusia, persistent cough        | 73·9 | 39·0 | 28 |
| anosmia/ageusia, dyspnoea, unusual muscle pains | 72·4 | 38·6 | 27 |
| fever, anosmia/ageusia, dyspnoea                | 72·2 | 38·1 | 27 |
| anosmia/ageusia, cough, dyspnoea                | 71·9 | 34·1 | 24 |
| anosmia/ageusia, dyspnoea, chest pain           | 66·6 | 34·0 | 22 |
| anosmia/ageusia, unusual muscle pains           | 65·4 | 30·4 | 19 |
| fever, anosmia/ageusia                          | 64·6 | 29·9 | 18 |
| anosmia/ageusia, persistent cough               | 64·1 | 26·8 | 16 |
| anosmia/ageusia, dyspnoea                       | 60·1 | 26·6 | 15 |
| anosmia/ageusia, delirium                       | 50·4 | 25·8 | 12 |

## Supplementary Figure e1 – Flow diagram of user selection for the discovery data cohort

CSS App users active from 24th of March to 15th of September 2020

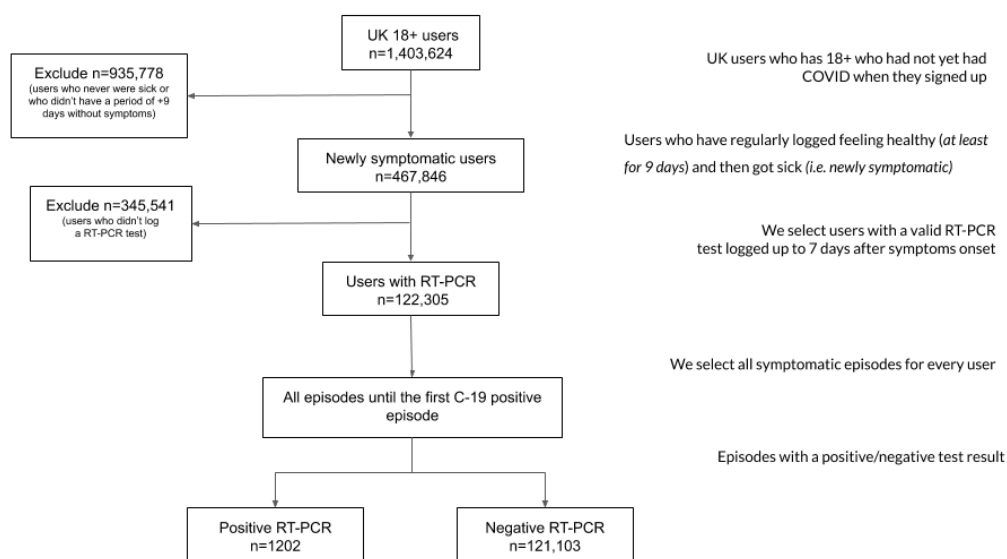

## Supplementary Figure e2 – Flow diagram of user selection for the replication data cohort

CSS App users active from 24th of March to 15th of September 2020

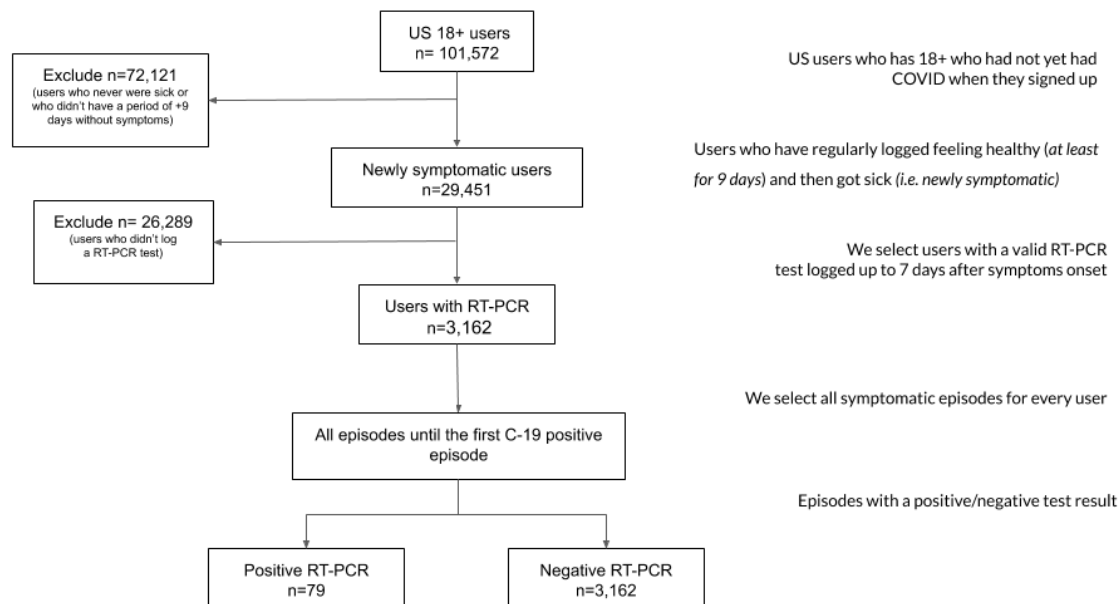

Supplement: NIHPP2020.11.23.20237313-supplement-1.pdf [file NIHPP2020.11.23.20237313-supplement-1.pdf]
